# Supplementary material for: The Long Noncoding RNA RPS10P2-AS1 Is Implicated in Autism Spectrum Disorder Risk and Modulates Gene Expression in Human Neuronal Progenitor Cells
Source: Front Genet. 2019 Oct 15;10:970. doi: 10.3389/fgene.2019.00970 (PMC6804435; doi:10.3389/fgene.2019.00970)
Supplement: Supplementary Table 2 — List of 143 genes with significant changes (P < 0.05) in expression following over-expression of RPS10P2-AS1 in ReNcell CX cells. [file Table_2.xlsx]

## Sheet: Sheet1
test_id	gene_id	gene type	gene	locus	log2 fold change	fold change	p_value	q_value
ENSG00000261221	ENSG00000261221	protein_coding	ZNF865	19:55605404-55617269	4.08527	16.9742	5e-05	0.0456472
ENSG00000160439	ENSG00000160439	protein_coding	RDH13	19:55006192-55071291	1.24588	2.37163	5e-05	0.0456472
ENSG00000137959	ENSG00000137959	protein_coding	IFI44L	1:78619921-78646145	-2.21211	-4.63352	5e-05	0.0456472
ENSG00000151012	ENSG00000151012	protein_coding	SLC7A11	4:138027421-138242349	-1.12489	-2.18085	5e-05	0.0456472
ENSG00000100292	ENSG00000100292	protein_coding	HMOX1	22:35380360-35394214	-1.16503	-2.24238	5e-05	0.0456472
ENSG00000172216	ENSG00000172216	protein_coding	CEBPB	20:50184597-50192689	-1.1829	-2.27033	5e-05	0.0456472
ENSG00000157601	ENSG00000157601	protein_coding	MX1	21:41420303-41459214	-1.38117	-2.6048	5e-05	0.0456472
ENSG00000070669	ENSG00000070669	protein_coding	ASNS	7:97852117-97872542	-1.09474	-2.13575	5e-05	0.0456472
ENSG00000126709	ENSG00000126709	protein_coding	IFI6	1:27666060-27703063	-1.04265	-2.06001	5e-05	0.0456472
ENSG00000105193	ENSG00000105193	protein_coding	RPS16	19:39433206-39435948	1.83299	3.56275	5e-05	0.0456472
ENSG00000137818	ENSG00000137818	protein_coding	RPLP1	15:69452783-69456194	1.26218	2.39858	5e-05	0.0456472
ENSG00000200795	ENSG00000200795	snRNA	RNU4-1	12:120293096-120293237	0.91334	1.8834	5e-05	0.0456472
ENSG00000202538	ENSG00000202538	snRNA	RNU4-2	12:120291762-120291903	0.827192	1.77423	5e-05	0.0456472
ENSG00000263934	ENSG00000263934	snoRNA	SNORD3A	17:19188015-19188714	0.884057	1.84556	5e-05	0.0456472
ENSG00000087085	ENSG00000087085	protein_coding	ACHE	7:100889993-100896974	-2.42894	-5.38498	0.0001	0.0864895
ENSG00000137965	ENSG00000137965	protein_coding	IFI44	1:78649795-78664078	-2.09835	-4.28219	0.00015	0.112043
ENSG00000131126	ENSG00000131126	protein_coding	TEX101	19:43401495-43418597	1.01337	2.01862	0.00015	0.112043
ENSG00000079102	ENSG00000079102	protein_coding	RUNX1T1	8:91954966-92103286	1.18495	2.27356	0.0003	0.189612
ENSG00000165795	ENSG00000165795	protein_coding	NDRG2	14:21016762-21104722	0.963543	1.95009	0.00045	0.254995
ENSG00000145506	ENSG00000145506	protein_coding	NKD2	5:1008828-1038943	-0.909445	-1.87832	0.0006	0.318058
ENSG00000150907	ENSG00000150907	protein_coding	FOXO1	13:40555666-40666597	1.42357	2.68248	0.00065	0.333795
ENSG00000205413	ENSG00000205413	protein_coding	SAMD9	7:93099512-93118023	-0.850574	-1.80322	0.00075	0.362493
ENSG00000187608	ENSG00000187608	protein_coding	ISG15	1:1001137-1014541	-0.755129	-1.68778	0.00075	0.362493
ENSG00000079482	ENSG00000079482	protein_coding	OPHN1	X:68042343-68433913	1.24038	2.36261	0.0008	0.375611
ENSG00000143545	ENSG00000143545	protein_coding	RAB13	1:153981616-153986358	0.553231	1.46737	0.00115	0.510755
ENSG00000117632	ENSG00000117632	protein_coding	STMN1	1:25884180-25906991	0.575895	1.4906	0.0013	0.547767
ENSG00000183876	ENSG00000183876	protein_coding	ARSI	5:150296342-150339307	-0.823425	-1.7696	0.00155	0.616238
ENSG00000256463	ENSG00000256463	protein_coding	SALL3	18:78980274-79002677	1.76943	3.40919	0.0016	0.616238
ENSG00000138162	ENSG00000138162	protein_coding	TACC2	10:121989173-122254545	0.846367	1.79797	0.00165	0.616237
ENSG00000237846	ENSG00000237846	processed_pseudogene	RP11-216M21.1	9:40105821-40106527	-1.13083	-2.18985	0.00165	0.616238
ENSG00000105499	ENSG00000105499	protein_coding	PLA2G4C	19:48047842-48110817	-1.64593	-3.1295	0.00175	0.639061
ENSG00000163399	ENSG00000163399	protein_coding	ATP1A1	1:116372667-116418622	0.535626	1.44957	0.0023	0.788113
ENSG00000269028	ENSG00000269028	protein_coding	MTRNR2L12	3:96617187-96618236	-0.728014	-1.65636	0.00235	0.788113
ENSG00000107201	ENSG00000107201	protein_coding	DDX58	9:32455704-32526324	-0.596706	-1.51226	0.00245	0.789428
ENSG00000241781	ENSG00000241781	miRNA	AL161626.1	9:76571814-76571871	1.25457	2.38596	0.0026	0.82165
ENSG00000181026	ENSG00000181026	protein_coding	AEN	15:88621295-88632282	-0.526095	-1.44003	0.0027	0.837153
ENSG00000180834	ENSG00000180834	protein_coding	MAP6D1	3:183815875-183825594	-1.35317	-2.55473	0.0041	0.9999
ENSG00000188042	ENSG00000188042	protein_coding	ARL4C	2:234493040-234497053	0.49701	1.41129	0.0041	0.9999
ENSG00000214336	ENSG00000214336	protein_coding	FOXI3	2:88446786-88452656	0.854329	1.80792	0.0047	0.9999
ENSG00000142632	ENSG00000142632	protein_coding	ARHGEF19	1:16197853-16212609	1.03204	2.04491	0.00555	0.9999
ENSG00000228502	ENSG00000228502	processed_pseudogene	EEF1A1P11	1:96446929-96448318	-1.2169	-2.32447	0.0063	0.9999
ENSG00000182195	ENSG00000182195	protein_coding	LDOC1	X:141175744-141177125	0.845636	1.79706	0.00765	0.9999
ENSG00000162772	ENSG00000162772	protein_coding	ATF3	1:212565333-212620777	-0.759827	-1.69329	0.008	0.9999
ENSG00000278771	ENSG00000278771	misc_RNA	Metazoa_SRP	14:49853615-49853914	0.445009	1.36132	0.0081	0.9999
ENSG00000239731	ENSG00000239731	misc_RNA	RN7SL825P	10:31992086-31992381	-2.19297	-4.57246	0.0084	0.9999
ENSG00000185442	ENSG00000185442	protein_coding	FAM174B	15:92602909-92809884	-1.88926	-3.70445	0.0087	0.9999
ENSG00000185499	ENSG00000185499	protein_coding	MUC1	1:155169407-155192916	1.17306	2.25489	0.00935	0.9999
ENSG00000148841	ENSG00000148841	protein_coding	ITPRIP	10:104309697-104338404	0.468547	1.38372	0.00935	0.9999
ENSG00000244642	ENSG00000244642	misc_RNA	RN7SL396P	8:119862661-119862956	-1.92943	-3.80905	0.00955	0.9999
ENSG00000130985	ENSG00000130985	protein_coding	UBA1	X:47190860-47215128	0.45567	1.37142	0.01005	0.9999
ENSG00000242150	ENSG00000242150	transcribed_processed_pseudogene	RP11-134G8.6	1:201483529-201533608	7.5994	193.931	0.01015	0.9999
ENSG00000150712	ENSG00000150712	protein_coding	MTMR12	5:32226993-32313009	0.771751	1.70734	0.0102	0.9999
ENSG00000183506	ENSG00000183506	transcribed_unprocessed_pseudogene	PI4KAP2	22:21472999-21517533	0.945052	1.92526	0.0104	0.9999
ENSG00000073350	ENSG00000073350	protein_coding	LLGL2	17:75525079-75575208	1.03904	2.05486	0.0106	0.9999
ENSG00000256618	ENSG00000256618	protein_coding	MTRNR2L1	17:22523110-22525696	-1.45892	-2.74902	0.0111	0.9999
ENSG00000165113	ENSG00000165113	protein_coding	GKAP1	9:83739420-83829516	-0.992175	-1.98918	0.01185	0.9999
ENSG00000223642	ENSG00000223642	antisense	AC008277.1	2:159318978-159617082	-2.89244	-7.42525	0.0126	0.9999
ENSG00000155090	ENSG00000155090	protein_coding	KLF10	8:102648778-102655902	-0.415536	-1.33379	0.01375	0.9999
ENSG00000233251	ENSG00000233251	antisense	AC007743.1	2:55952157-56386173	0.787659	1.72627	0.0139	0.9999
ENSG00000168003	ENSG00000168003	protein_coding	SLC3A2	11:62856101-62888875	-0.598673	-1.51432	0.0142	0.9999
ENSG00000101057	ENSG00000101057	protein_coding	MYBL2	20:43667018-43716496	0.492507	1.40689	0.0148	0.9999
ENSG00000123146	ENSG00000123146	protein_coding	ADGRE5	19:14380500-14408725	0.577797	1.49257	0.0161	0.9999
ENSG00000164066	ENSG00000164066	protein_coding	INTU	4:127623270-127726737	-0.903572	-1.87069	0.01645	0.9999
ENSG00000163975	ENSG00000163975	protein_coding	MFI2	3:196988620-197029816	1.26956	2.41088	0.0166	0.9999
ENSG00000140450	ENSG00000140450	protein_coding	ARRDC4	15:97960697-97973838	-0.412204	-1.33072	0.01665	0.9999
ENSG00000128965	ENSG00000128965	protein_coding	CHAC1	15:40952961-40956519	-1.07233	-2.10283	0.0178	0.9999
ENSG00000015568	ENSG00000015568	protein_coding	RGPD5	2:109792757-109857695	1.08829	2.12622	0.0179	0.9999
ENSG00000018625	ENSG00000018625	protein_coding	ATP1A2	1:160115758-160143591	0.447614	1.36378	0.01895	0.9999
ENSG00000138678	ENSG00000138678	protein_coding	AGPAT9	4:83535913-83605875	-0.588209	-1.50338	0.019	0.9999
ENSG00000157600	ENSG00000157600	protein_coding	TMEM164	X:110002630-110182734	1.11662	2.16838	0.01925	0.9999
ENSG00000179241	ENSG00000179241	protein_coding	LDLRAD3	11:35943980-36232136	0.43053	1.34773	0.0199	0.9999
ENSG00000169992	ENSG00000169992	protein_coding	NLGN2	17:7404873-7419860	0.549833	1.46392	0.02025	0.9999
ENSG00000099860	ENSG00000099860	protein_coding	GADD45B	19:2476121-2478259	-0.627428	-1.54481	0.02145	0.9999
ENSG00000141577	ENSG00000141577	protein_coding	CEP131	17:81189592-81222999	0.670055	1.59113	0.02195	0.9999
ENSG00000151692	ENSG00000151692	protein_coding	RNF144A	2:6912276-7077880	0.732525	1.66154	0.0224	0.9999
ENSG00000124370	ENSG00000124370	protein_coding	MCEE	2:71109683-71130239	-0.896495	-1.86154	0.02275	0.9999
ENSG00000239112	ENSG00000239112	snoRNA	SNORD123	5:9546199-9550609	0.864343	1.82051	0.02355	0.9999
ENSG00000110958	ENSG00000110958	protein_coding	PTGES3	12:56663340-56688408	0.389073	1.30955	0.0236	0.9999
ENSG00000232956	ENSG00000232956	lincRNA	SNHG15	7:44983022-44986961	-0.62458	-1.54176	0.0243	0.9999
ENSG00000127249	ENSG00000127249	protein_coding	ATP13A4	3:193402076-193593111	-1.17184	-2.25299	0.02475	0.9999
ENSG00000074935	ENSG00000074935	protein_coding	TUBE1	6:112054071-112087529	-0.683707	-1.60626	0.02605	0.9999
ENSG00000107438	ENSG00000107438	protein_coding	PDLIM1	10:95237571-95291024	0.573191	1.48781	0.0262	0.9999
ENSG00000143772	ENSG00000143772	protein_coding	ITPKB	1:226631689-226739323	0.433894	1.35087	0.0267	0.9999
ENSG00000153879	ENSG00000153879	protein_coding	CEBPG	19:33373329-33382686	-0.390231	-1.3106	0.0268	0.9999
ENSG00000139182	ENSG00000139182	protein_coding	CLSTN3	12:7129078-7158945	0.937685	1.91545	0.02695	0.9999
ENSG00000208037	ENSG00000208037	miRNA	MIR320A	8:22244961-22245043	1.05451	2.07701	0.0276	0.9999
ENSG00000176533	ENSG00000176533	protein_coding	GNG7	19:2511218-2702709	0.691091	1.6145	0.02795	0.9999
ENSG00000201558	ENSG00000201558	snRNA	RNVU1-6	1:146052080-146052244	0.921339	1.89387	0.0284	0.9999
ENSG00000138071	ENSG00000138071	protein_coding	ACTR2	2:65227752-65271253	0.441797	1.3583	0.02865	0.9999
ENSG00000270722	ENSG00000270722	snRNA	U1	1:145465616-145465780	0.850157	1.8027	0.02865	0.9999
ENSG00000274180	ENSG00000274180	protein_coding	NATD1	17:21238869-21253410	0.653408	1.57288	0.0293	0.9999
ENSG00000171451	ENSG00000171451	protein_coding	DSEL	18:67506581-67899619	-0.531037	-1.44497	0.0313	0.9999
ENSG00000136938	ENSG00000136938	protein_coding	ANP32B	9:97983360-98015943	0.540113	1.45409	0.032	0.9999
ENSG00000232040	ENSG00000232040	protein_coding	ZBED9	6:28571629-28616212	-1.18922	-2.28029	0.03205	0.9999
ENSG00000087074	ENSG00000087074	protein_coding	PPP1R15A	19:48872391-48876057	-0.397652	-1.31736	0.0321	0.9999
ENSG00000152778	ENSG00000152778	protein_coding	IFIT5	10:89414585-89421001	-0.389444	-1.30989	0.0322	0.9999
ENSG00000096070	ENSG00000096070	protein_coding	BRPF3	6:36146697-36232790	-0.981953	-1.97514	0.03235	0.9999
ENSG00000199347	ENSG00000199347	snRNA	RNU5E-1	1:11908151-11908271	1.38097	2.60443	0.03285	0.9999
ENSG00000108602	ENSG00000108602	protein_coding	ALDH3A1	17:19737681-19748943	-0.732993	-1.66208	0.0338	0.9999
ENSG00000147027	ENSG00000147027	protein_coding	TMEM47	X:34627063-34657288	-0.40569	-1.32472	0.034	0.9999
ENSG00000075651	ENSG00000075651	protein_coding	PLD1	3:171600404-171810950	0.907204	1.87541	0.03405	0.9999
ENSG00000163814	ENSG00000163814	protein_coding	CDCP1	3:45082277-45146422	0.36213	1.28532	0.03425	0.9999
ENSG00000141682	ENSG00000141682	protein_coding	PMAIP1	18:59899947-59904306	-0.442826	-1.35926	0.0343	0.9999
ENSG00000138376	ENSG00000138376	protein_coding	BARD1	2:214725645-214809711	1.39088	2.62239	0.03455	0.9999
ENSG00000164976	ENSG00000164976	protein_coding	KIAA1161	9:34366669-34376853	0.37389	1.29584	0.0347	0.9999
ENSG00000158710	ENSG00000158710	protein_coding	TAGLN2	1:159918106-159925732	0.390393	1.31075	0.03475	0.9999
ENSG00000142173	ENSG00000142173	protein_coding	COL6A2	21:46098096-46132849	0.394459	1.31445	0.03495	0.9999
ENSG00000073060	ENSG00000073060	protein_coding	SCARB1	12:124776855-124882668	0.41254	1.33103	0.03535	0.9999
ENSG00000143320	ENSG00000143320	protein_coding	CRABP2	1:156699605-156705816	-1.03915	-2.05502	0.0355	0.9999
ENSG00000187764	ENSG00000187764	protein_coding	SEMA4D	9:89360786-89498130	-0.739906	-1.67007	0.03565	0.9999
ENSG00000185745	ENSG00000185745	protein_coding	IFIT1	10:89213568-89414557	-1.22812	-2.34262	0.0365	0.9999
ENSG00000138035	ENSG00000138035	protein_coding	PNPT1	2:55634264-55693910	-0.765513	-1.69997	0.03725	0.9999
ENSG00000136111	ENSG00000136111	protein_coding	TBC1D4	13:75284664-75482114	0.815142	1.75947	0.03735	0.9999
ENSG00000134333	ENSG00000134333	protein_coding	LDHA	11:18394387-18408425	0.39739	1.31712	0.03745	0.9999
ENSG00000266714	ENSG00000266714	protein_coding	MYO15B	17:75588057-75626501	0.928064	1.90272	0.0381	0.9999
ENSG00000204681	ENSG00000204681	protein_coding	GABBR1	6:29555514-29633976	0.769327	1.70447	0.03875	0.9999
ENSG00000241172	ENSG00000241172	misc_RNA	RN7SL70P	19:18957956-18958258	-2.96381	-7.80182	0.04135	0.9999
ENSG00000120318	ENSG00000120318	protein_coding	ARAP3	5:141653400-141682221	0.610076	1.52634	0.04145	0.9999
ENSG00000197635	ENSG00000197635	protein_coding	DPP4	2:161992240-162075169	-0.722458	-1.64999	0.04175	0.9999
ENSG00000182175	ENSG00000182175	protein_coding	RGMA	15:93035272-93089204	0.376412	1.29811	0.0418	0.9999
ENSG00000148737	ENSG00000148737	protein_coding	TCF7L2	10:112950249-113167678	0.691193	1.61462	0.0419	0.9999
ENSG00000239887	ENSG00000239887	protein_coding	C1orf226	1:162069773-162386818	0.807678	1.75039	0.04275	0.9999
ENSG00000101160	ENSG00000101160	protein_coding	CTSZ	20:58995184-59007247	0.398502	1.31814	0.04275	0.9999
ENSG00000104267	ENSG00000104267	protein_coding	CA2	8:85327607-85481493	0.740575	1.67084	0.04335	0.9999
ENSG00000223804	ENSG00000223804	transcribed_unprocessed_pseudogene	CH17-472G23.2	1:120197084-120341871	1.54747	2.92304	0.04365	0.9999
ENSG00000115290	ENSG00000115290	protein_coding	GRB14	2:164492811-164621848	-1.11793	-2.17035	0.044	0.9999
ENSG00000131389	ENSG00000131389	protein_coding	SLC6A6	3:14402575-14542081	-0.915274	-1.88593	0.04435	0.9999
ENSG00000166900	ENSG00000166900	protein_coding	STX3	11:59712822-59805882	-0.691622	-1.6151	0.0449	0.9999
ENSG00000096060	ENSG00000096060	protein_coding	FKBP5	6:35573584-35728583	0.386845	1.30753	0.04505	0.9999
ENSG00000139718	ENSG00000139718	protein_coding	SETD1B	12:121804179-121832584	0.423905	1.34155	0.04595	0.9999
ENSG00000189369	ENSG00000189369	protein_coding	GSPT2	X:51743430-51746232	-0.372817	-1.29488	0.04595	0.9999
ENSG00000197747	ENSG00000197747	protein_coding	S100A10	1:151982914-151994390	0.351734	1.27609	0.04605	0.9999
ENSG00000130635	ENSG00000130635	protein_coding	COL5A1	9:134641773-134844843	0.529626	1.44355	0.0463	0.9999
ENSG00000136436	ENSG00000136436	protein_coding	CALCOCO2	17:48830987-48866522	0.60052	1.51626	0.0466	0.9999
ENSG00000102007	ENSG00000102007	protein_coding	PLP2	X:49171925-49175239	0.360543	1.28391	0.04675	0.9999
ENSG00000019144	ENSG00000019144	protein_coding	PHLDB1	11:118606439-118679690	0.47388	1.38884	0.04685	0.9999
ENSG00000153339	ENSG00000153339	protein_coding	TRAPPC8	18:31829172-31953136	-0.50629	-1.42039	0.0473	0.9999
ENSG00000090006	ENSG00000090006	protein_coding	LTBP4	19:40592882-40629818	0.88867	1.85147	0.04755	0.9999
ENSG00000274070	ENSG00000274070	protein_coding	GATSL2	7:74964817-75024798	0.49454	1.40887	0.0481	0.9999
ENSG00000111727	ENSG00000111727	protein_coding	HCFC2	12:104064456-104106524	-0.523767	-1.4377	0.04835	0.9999
ENSG00000106211	ENSG00000106211	protein_coding	HSPB1	7:76302543-76304295	0.400241	1.31973	0.0494	0.9999
ENSG00000101782	ENSG00000101782	protein_coding	RIOK3	18:23452822-23486603	-0.456326	-1.37204	0.0495	0.9999
ENSG00000159164	ENSG00000159164	protein_coding	SV2A	1:149903317-149917882	0.330255	1.25724	0.04975	0.9999
